# Supplementary material for: Fabrication of ZIF-9@super-macroporous microsphere for adsorptive removal of Congo red from water
Source: Royal Society of Chemistry journal article supplement (doi:10.1039/c6ra26763g), 2017-01-01
Supplement: c6ra26763g1.pdf [file c6ra26763g1.pdf]

# Electronic Supplementary Information

for

Fabrication of ZIF-9@super-macroporous microsphere for  
adsorptive removal of Congo Red from water

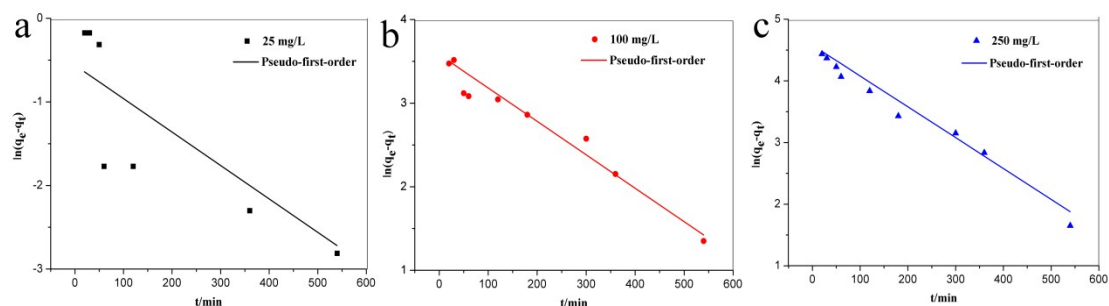

**Fig. S1** The pseudo-first-order kinetics for adsorption of CR on the ZIF-9@SMM (the adsorption time  $t$  from 20 min to 540 min, and the  $q_t$  at 720 min used as  $q_e$  for fitting data).

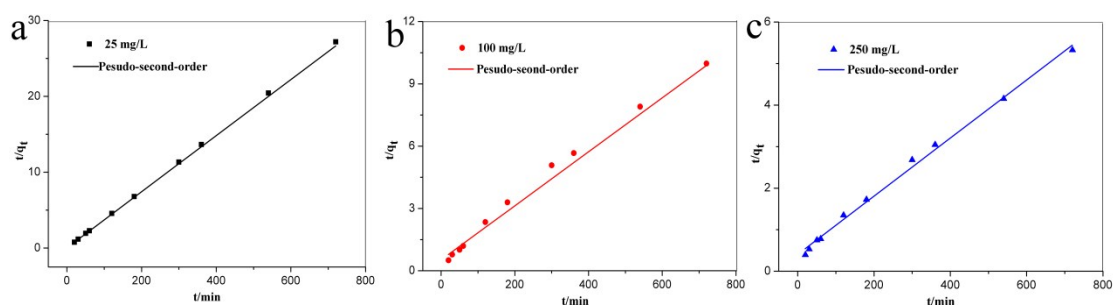

**Fig. S2** The pseudo-second-order kinetics for adsorption of CR on the ZIF-9@SMM (the adsorption time  $t$  from 20 min to 720 min).
